# Supplementary material for: Design, nanogel synthesis, anti-proliferative activity and in silico ADMET profile of pyrazoles and pyrimidines as topo-II inhibitors and DNA intercalators
Source: Royal Society of Chemistry journal article supplement (doi:10.1039/d5ra00166h), 2025-01-01

# **Design, nanogel synthesis, anti-proliferative and *in silico* ADMET of pyrazoles and/or pyrimidines as Topo-II Inhibitors and DNA intercalators**

Ahmed K. B. Aljohani<sup>1</sup>, Sanadelaslam SA El-Hddad<sup>2</sup>, Marwa Alsulaimany<sup>3</sup>, Nader A. Maghrabi<sup>4</sup>, Alaa M. Alhammad<sup>4</sup>, Mayar N. Aloufi<sup>4</sup>, Luai F. Alahmadi<sup>4</sup>, Turkiah Ali Saeedi<sup>4</sup>, Yousef Yakoub Neyaz<sup>4</sup>, Kurlis E. Anwer<sup>5</sup>, Nour E. A. Abd El-Sattar<sup>5,6</sup>, and Khaled El-Adl<sup>7,8,\*</sup>

<sup>1</sup>Pharmacognosy and Pharmaceutical Chemistry Department, College of Pharmacy, Taibah University, Al-Madinah Al-Munawarah 41477, Saudi Arabia

<sup>2</sup>Pharmaceutical Chemistry Department, Faculty of Pharmacy, Omar Al-mukhtar University, Al Bayda 991, Libya

<sup>3</sup>Department of Pharmacognosy & Pharmaceutical Chemistry, College of Pharmacy, Taibah University, Medina, 42353, Saudi Arabia

<sup>4</sup>Pharmacy Student, College of Pharmacy, Taibah University, Medina, Saudi Arabia

<sup>5</sup>Department of Chemistry, Faculty of Science, Ain Shams University, Abbassia, Cairo, Egypt

<sup>6</sup>Basic & Medical Sciences Department, Faculty of Dentistry, Alryada University for Science & Technology, Egypt

<sup>7</sup>Chemistry Department, Faculty of Pharmacy, Heliopolis University for Sustainable Development, Cairo, Egypt

<sup>8</sup>Pharmaceutical Medicinal Chemistry and Drug Design Department, Faculty of Pharmacy (Boys), Al-Azhar University, Nasr City 11884, Cairo, Egypt

Corresponding Author\*: Khaled El-Adl, [eladlkhaled74@yahoo.com](mailto:eladlkhaled74@yahoo.com); [eladlkhaled74@azhar.edu.eg](mailto:eladlkhaled74@azhar.edu.eg); [khaled.eladl@hu.edu.eg](mailto:khaled.eladl@hu.edu.eg)

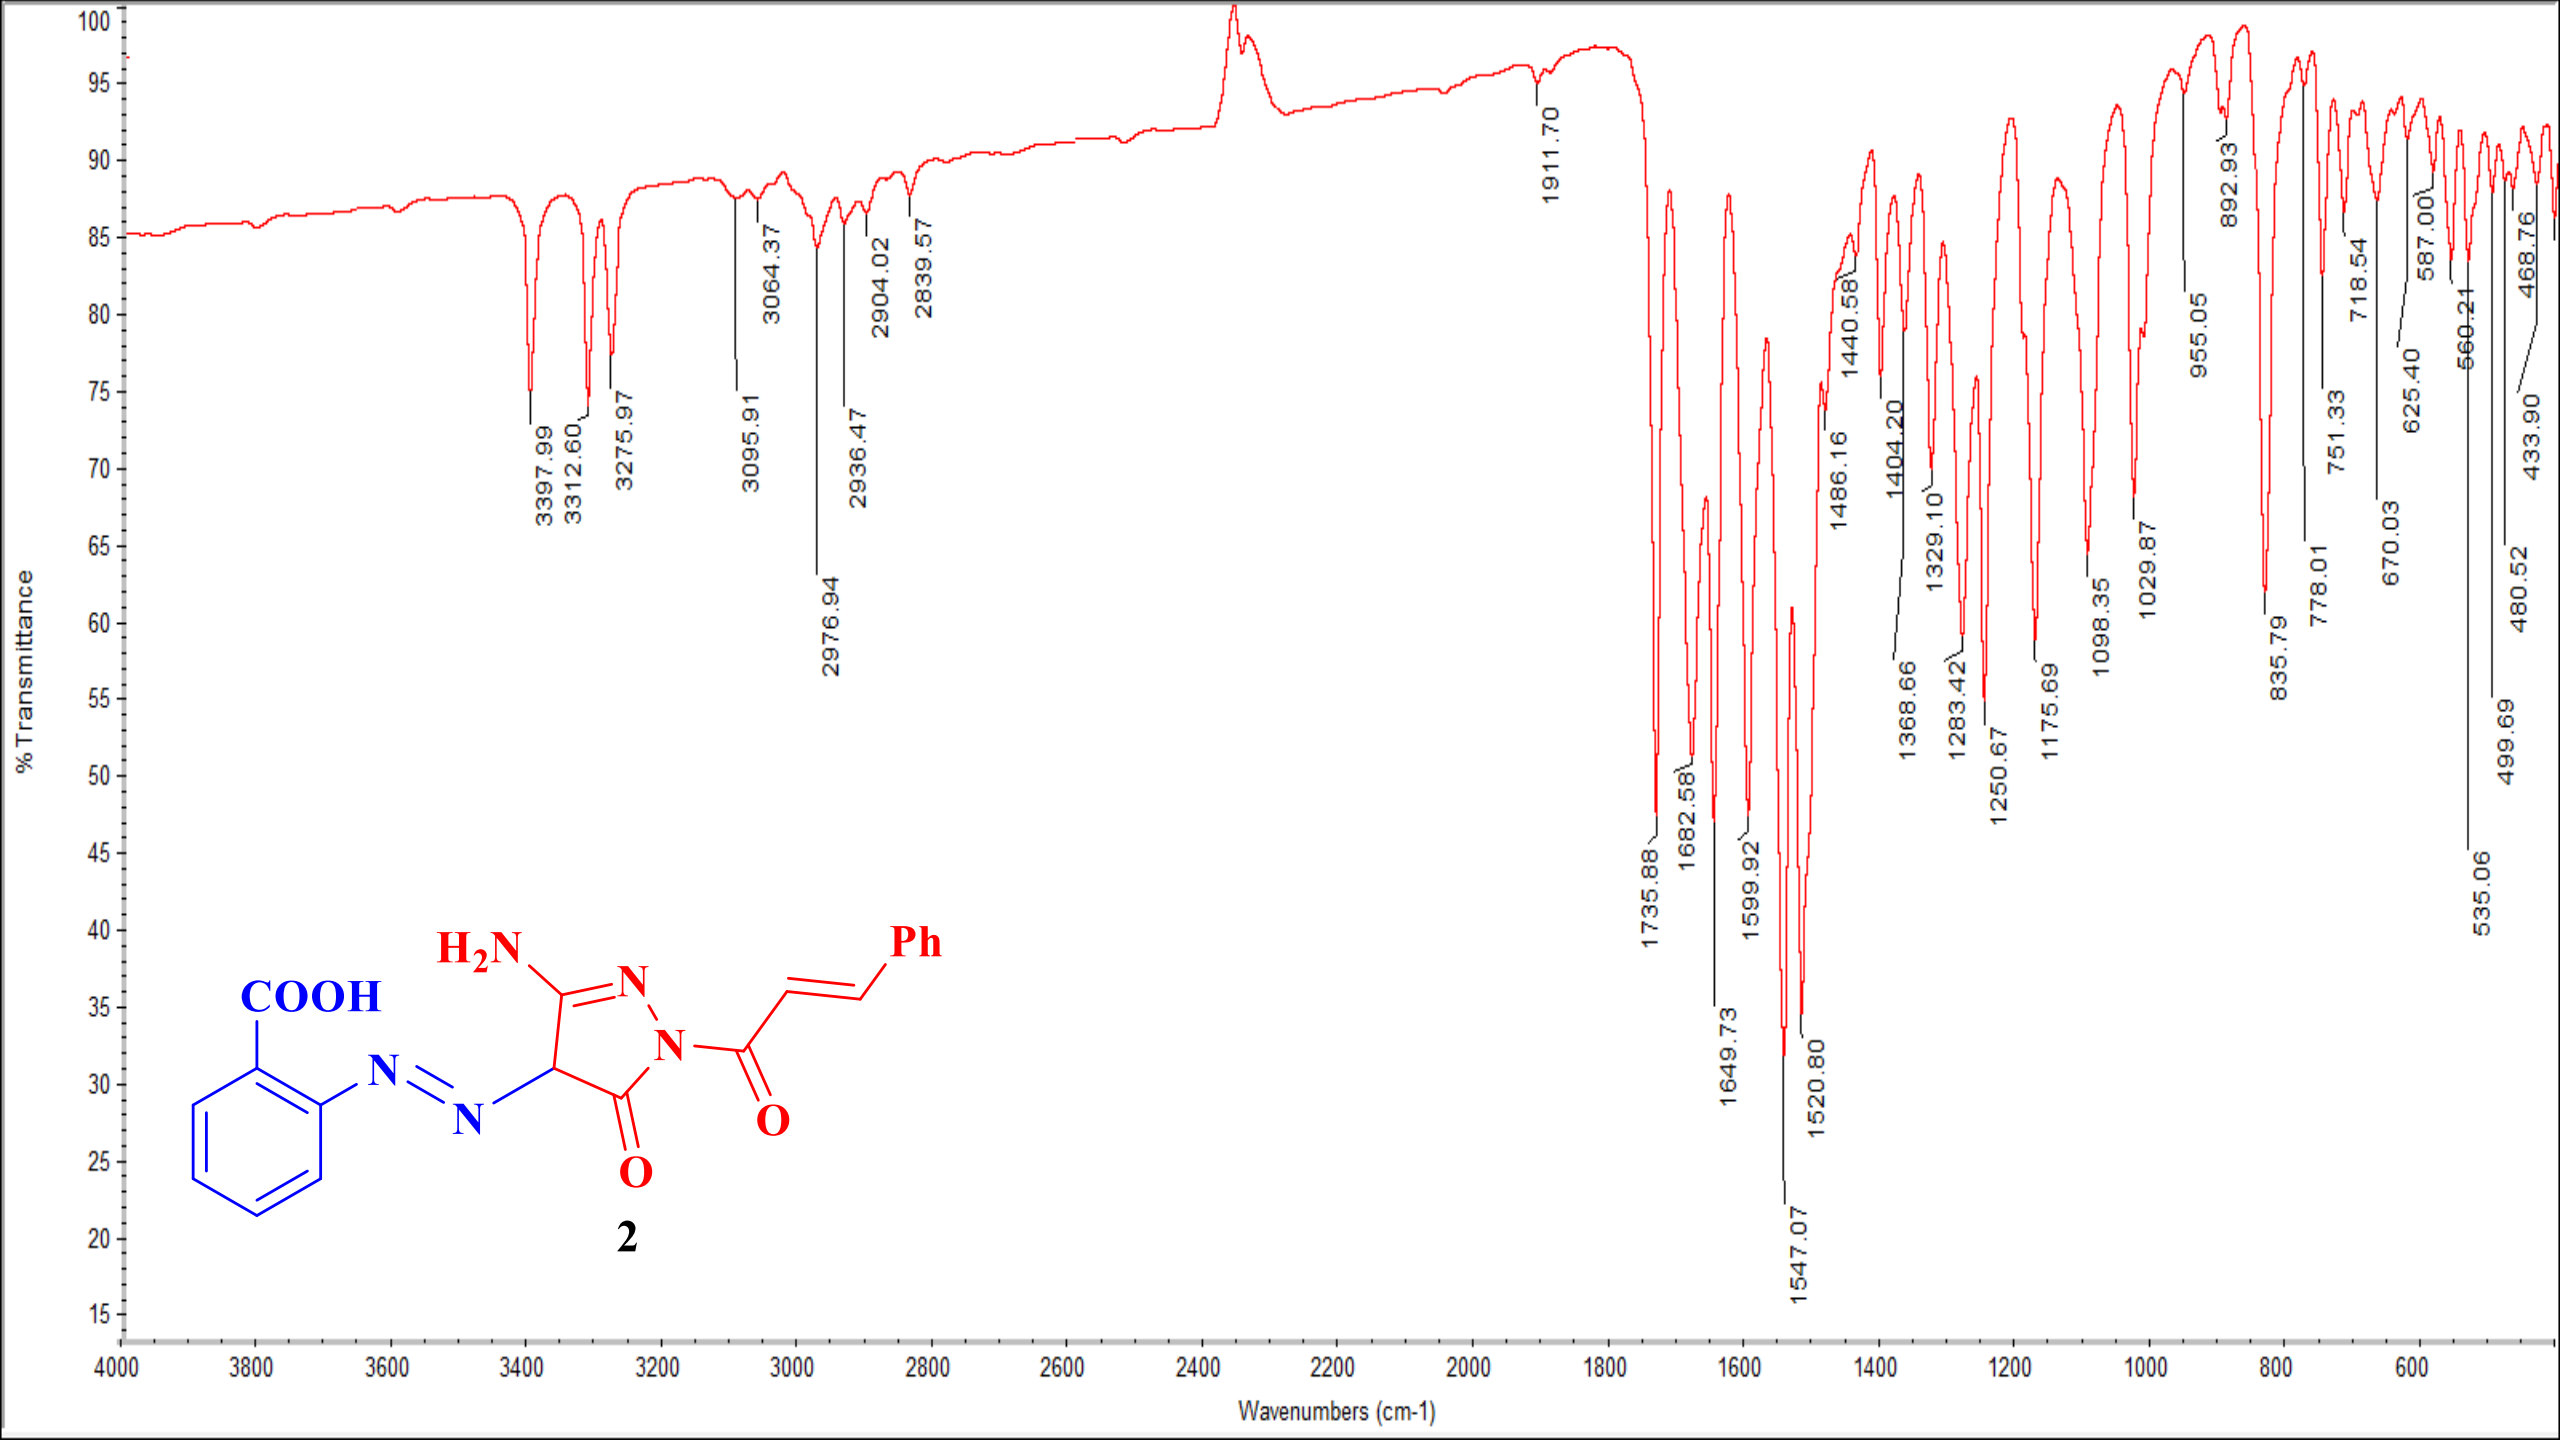

REC10-Hnmr-RR

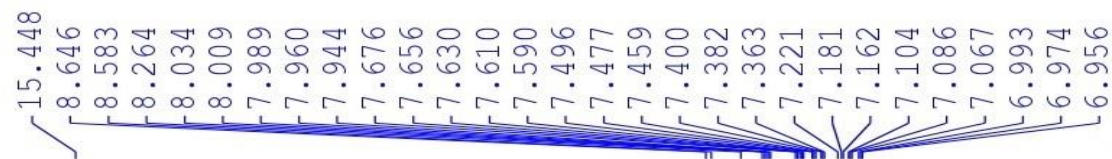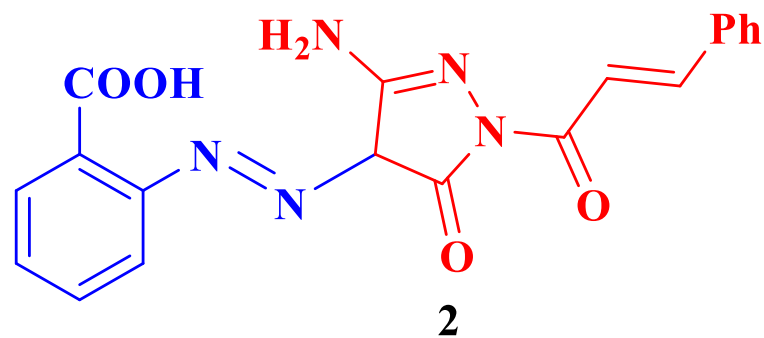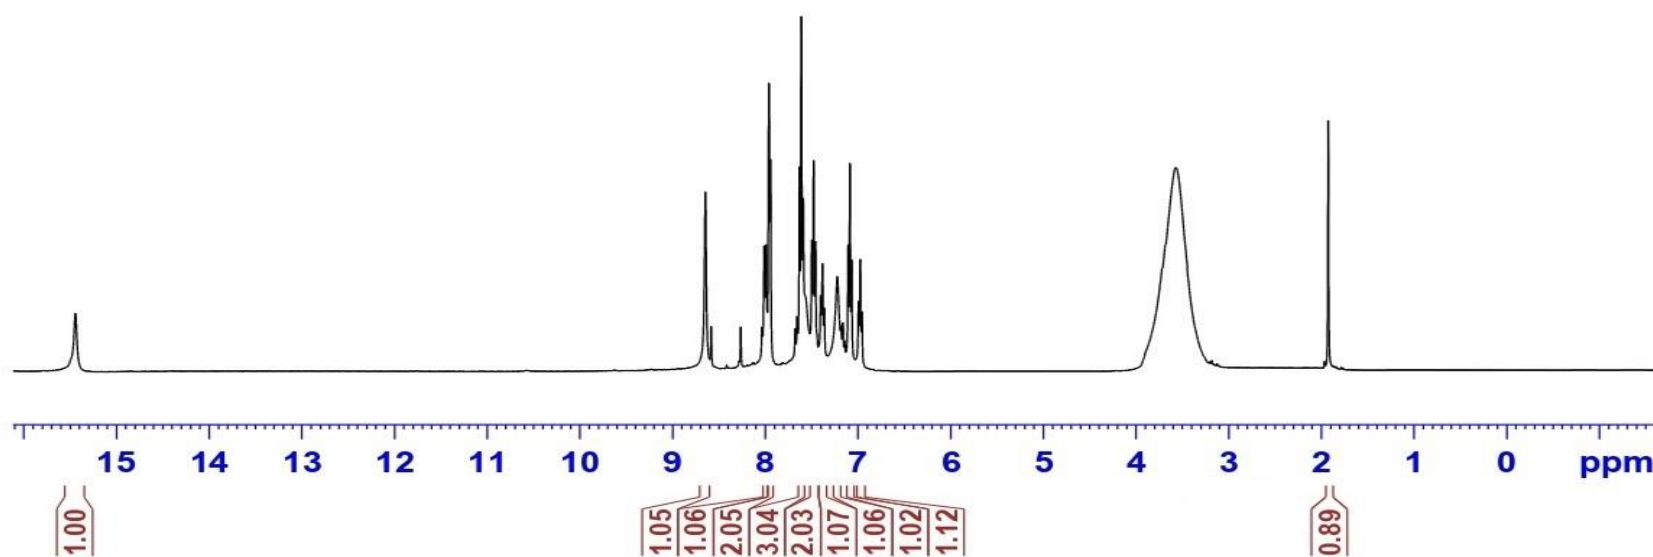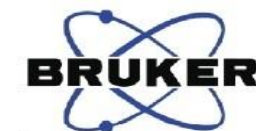

F2 - Acquisition Parameters  
 Date\_ 20240615  
 Time\_ 15.28 h  
 INSTRUM spect  
 PROBHD z108618\_0945 (   
 PULPROG zg30  
 TD 65536  
 SOLVENT DMSO  
 NS 16  
 DS 2  
 SWH 8012.820 Hz  
 FIDRES 0.244532 Hz  
 AQ 4.0894465 sec  
 RG 59.56  
 DW 62.400 usec  
 DE 6.50 usec  
 TE 0 K  
 D1 1.00000000 sec  
 TD0 1  
 SFO1 400.2024712 MHz  
 NUC1 1H  
 P1 13.50 usec  
 PLW1 13.00000000 W

F2 - Processing parameters  
 SI 65536  
 SF 400.2000000 MHz  
 WDW EM  
 SSB 0  
 LB 0.30 Hz  
 GB 0  
 PC 1.00

# REC10-CNMR-DMSO-SH

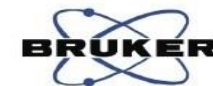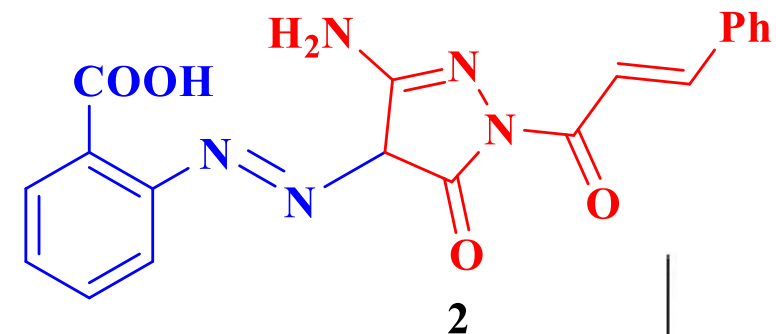

2

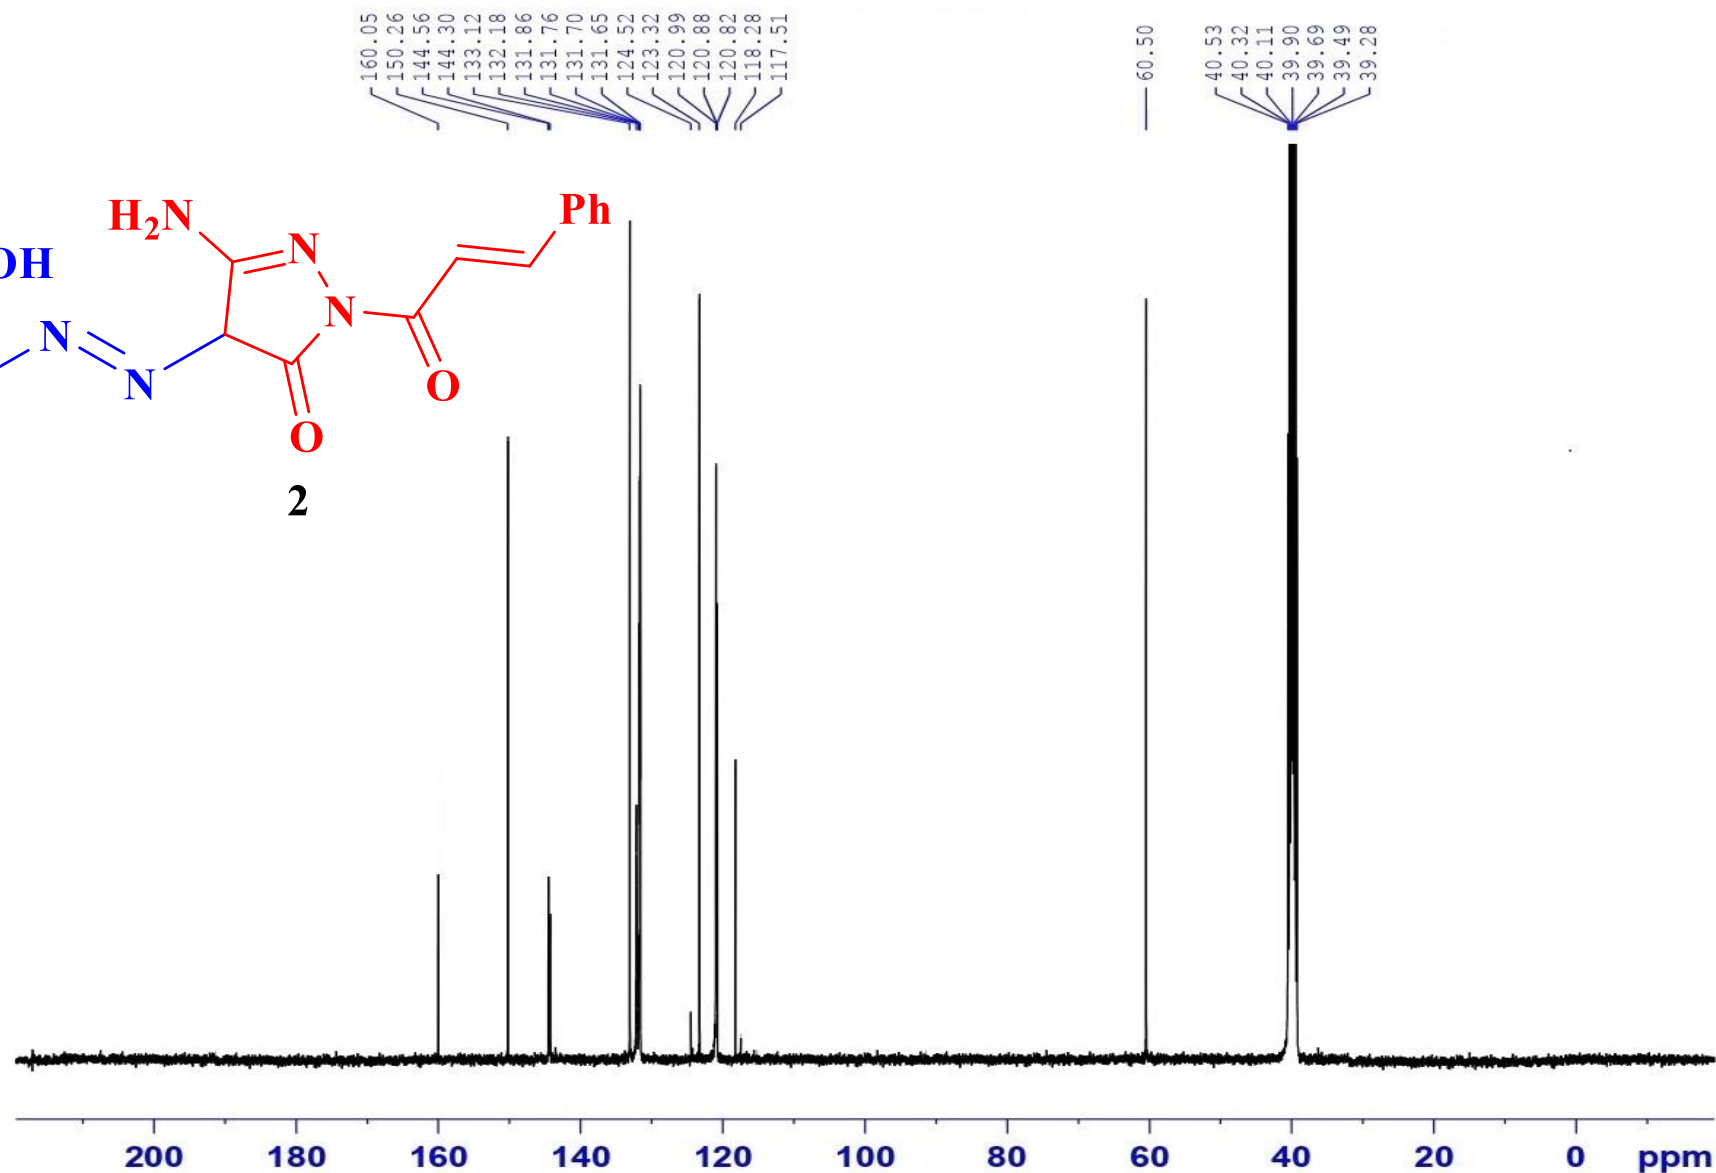

F2 - Acquisition Parameters  
 Date\_ 20240618  
 Time\_ 4.24 h  
 INSTRUM spect  
 PROBHD 2108618\_0945 (   
 PULPROG zgpg30  
 TD 65536  
 SOLVENT DMSO  
 NS 2200  
 DS 4  
 SWH 24038.461 Hz  
 FIDRES 0.732896 Hz  
 AQ 1.2621488 sec  
 RG 88.24  
 DW 20.800 usec  
 DE 8.50 usec  
 TE 296.2 K  
 D1 2.00000000 sec  
 D11 0.03000000 sec  
 TDO 1  
 SFO1 100.6204231 MHz  
 NUC1 13C  
 P1 10.00 usec  
 PLW1 47.00000000 W  
 SFO2 400.2016008 MHz  
 NUC2 1H  
 CPDPRG12 waltz16  
 PCPD2 90.00 usec  
 PLW2 13.00000000 W  
 PLW12 0.29249999 W  
 PLW13 0.14713000 W  
  
 F2 - Processing parameters  
 SI 32768  
 SF 100.6203700 MHz  
 WDW EM  
 SSB 0  
 LB 1.00 Hz  
 GB 0  
 PC 1.40

REC10 #85 RT: 1.44 P: + NL: 7.78E2  
T: {0,0} + c EI Full ms [40.00-1000.00]

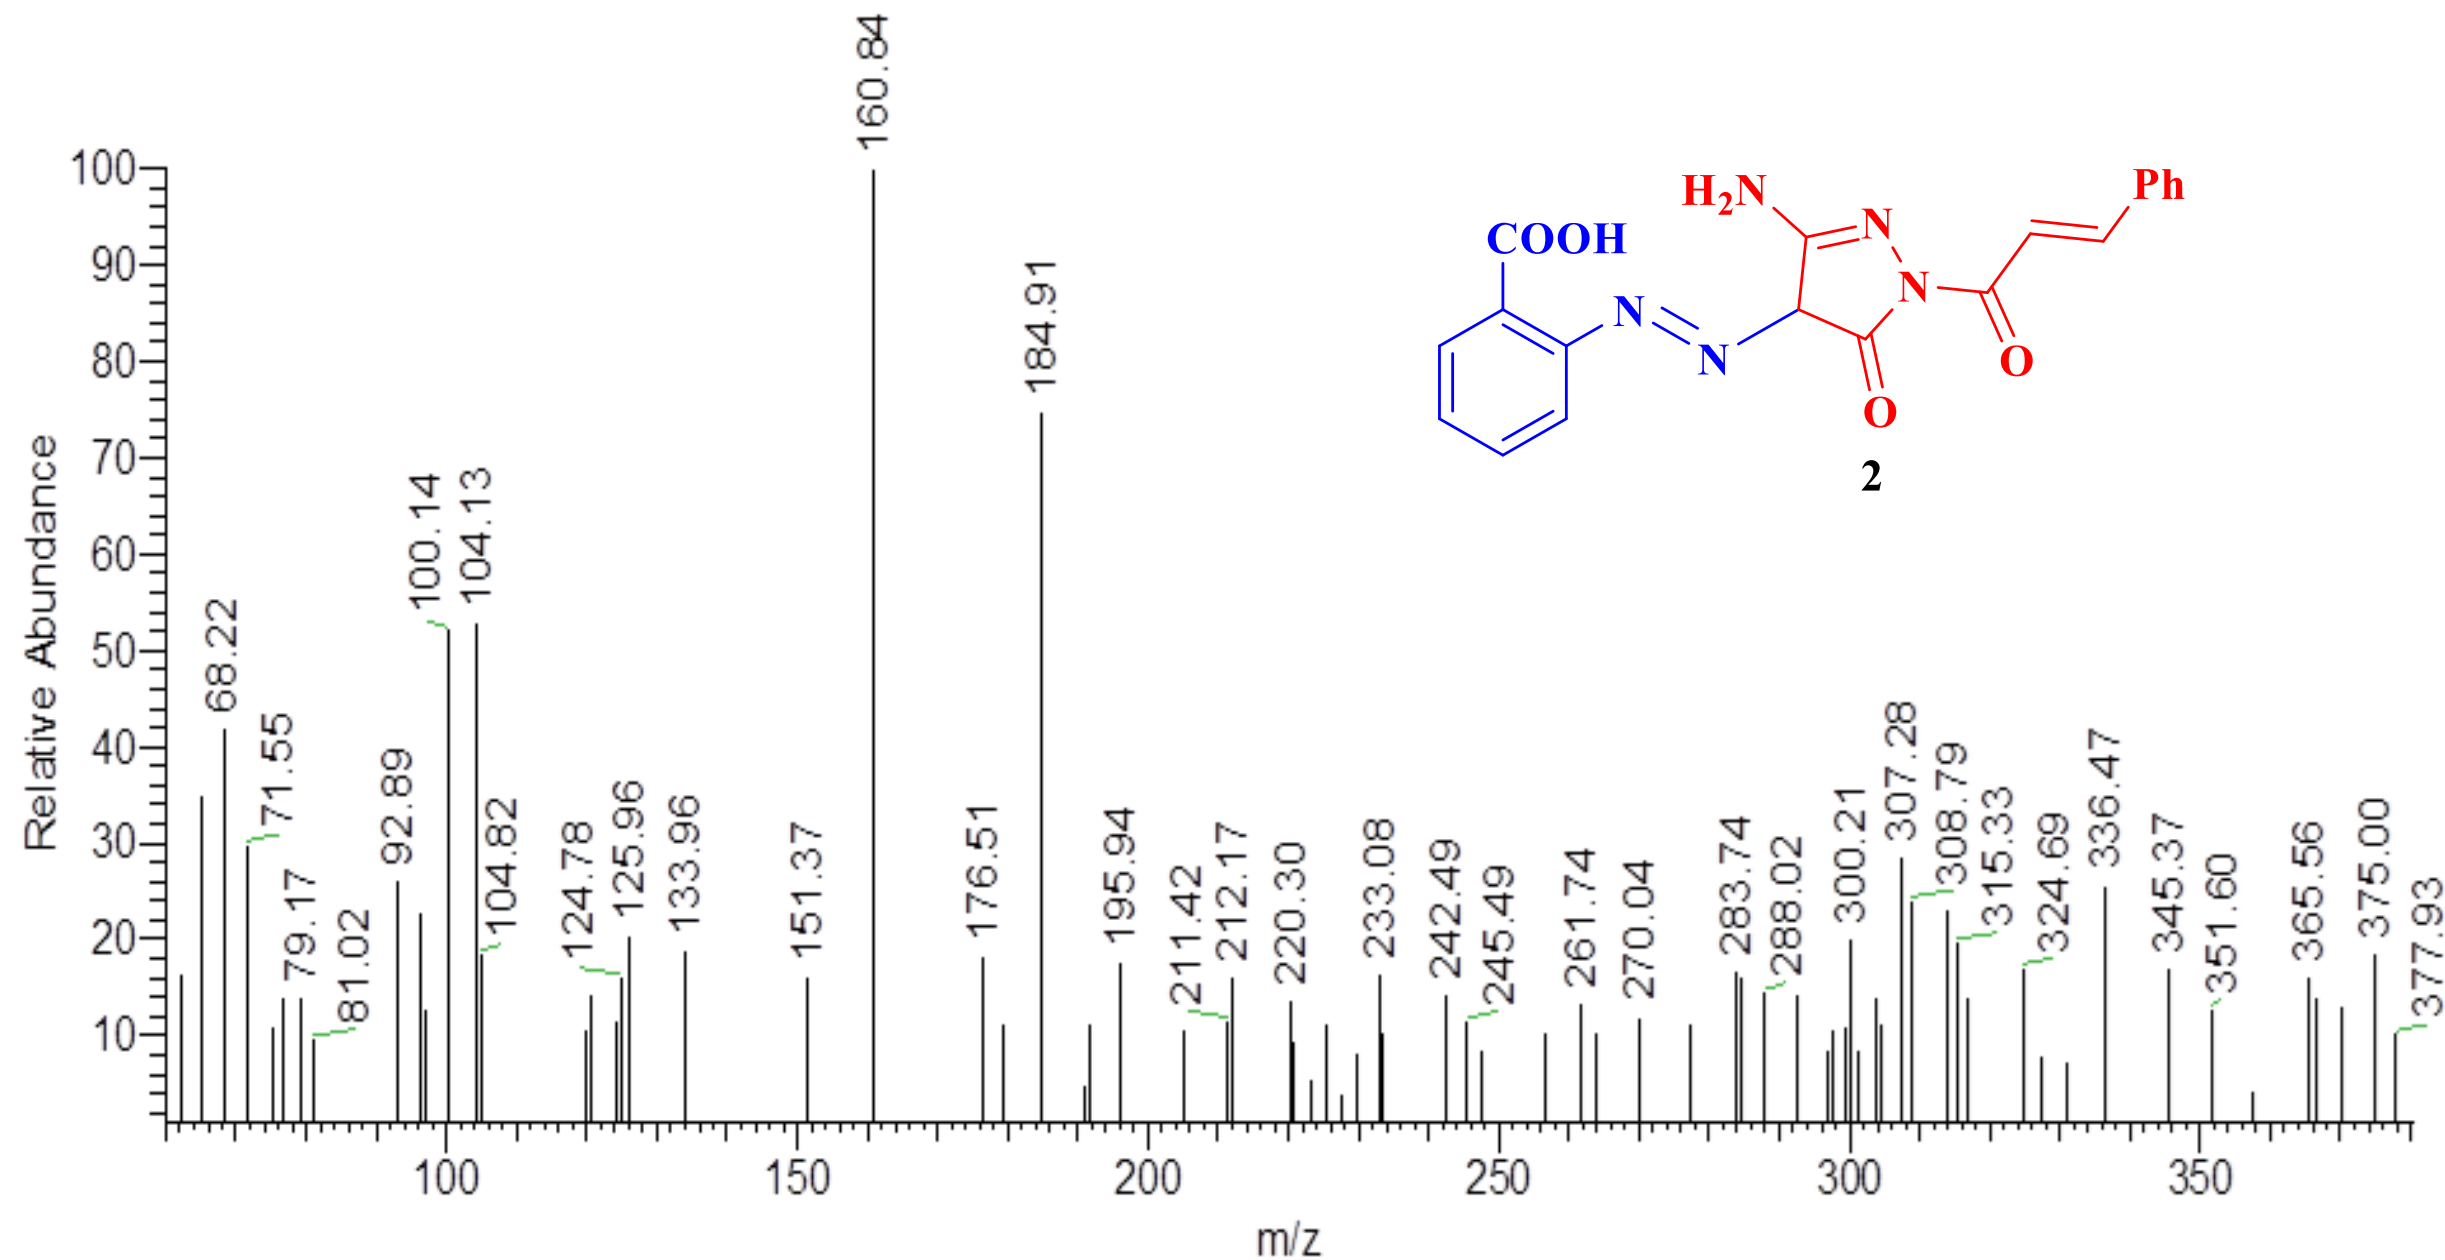

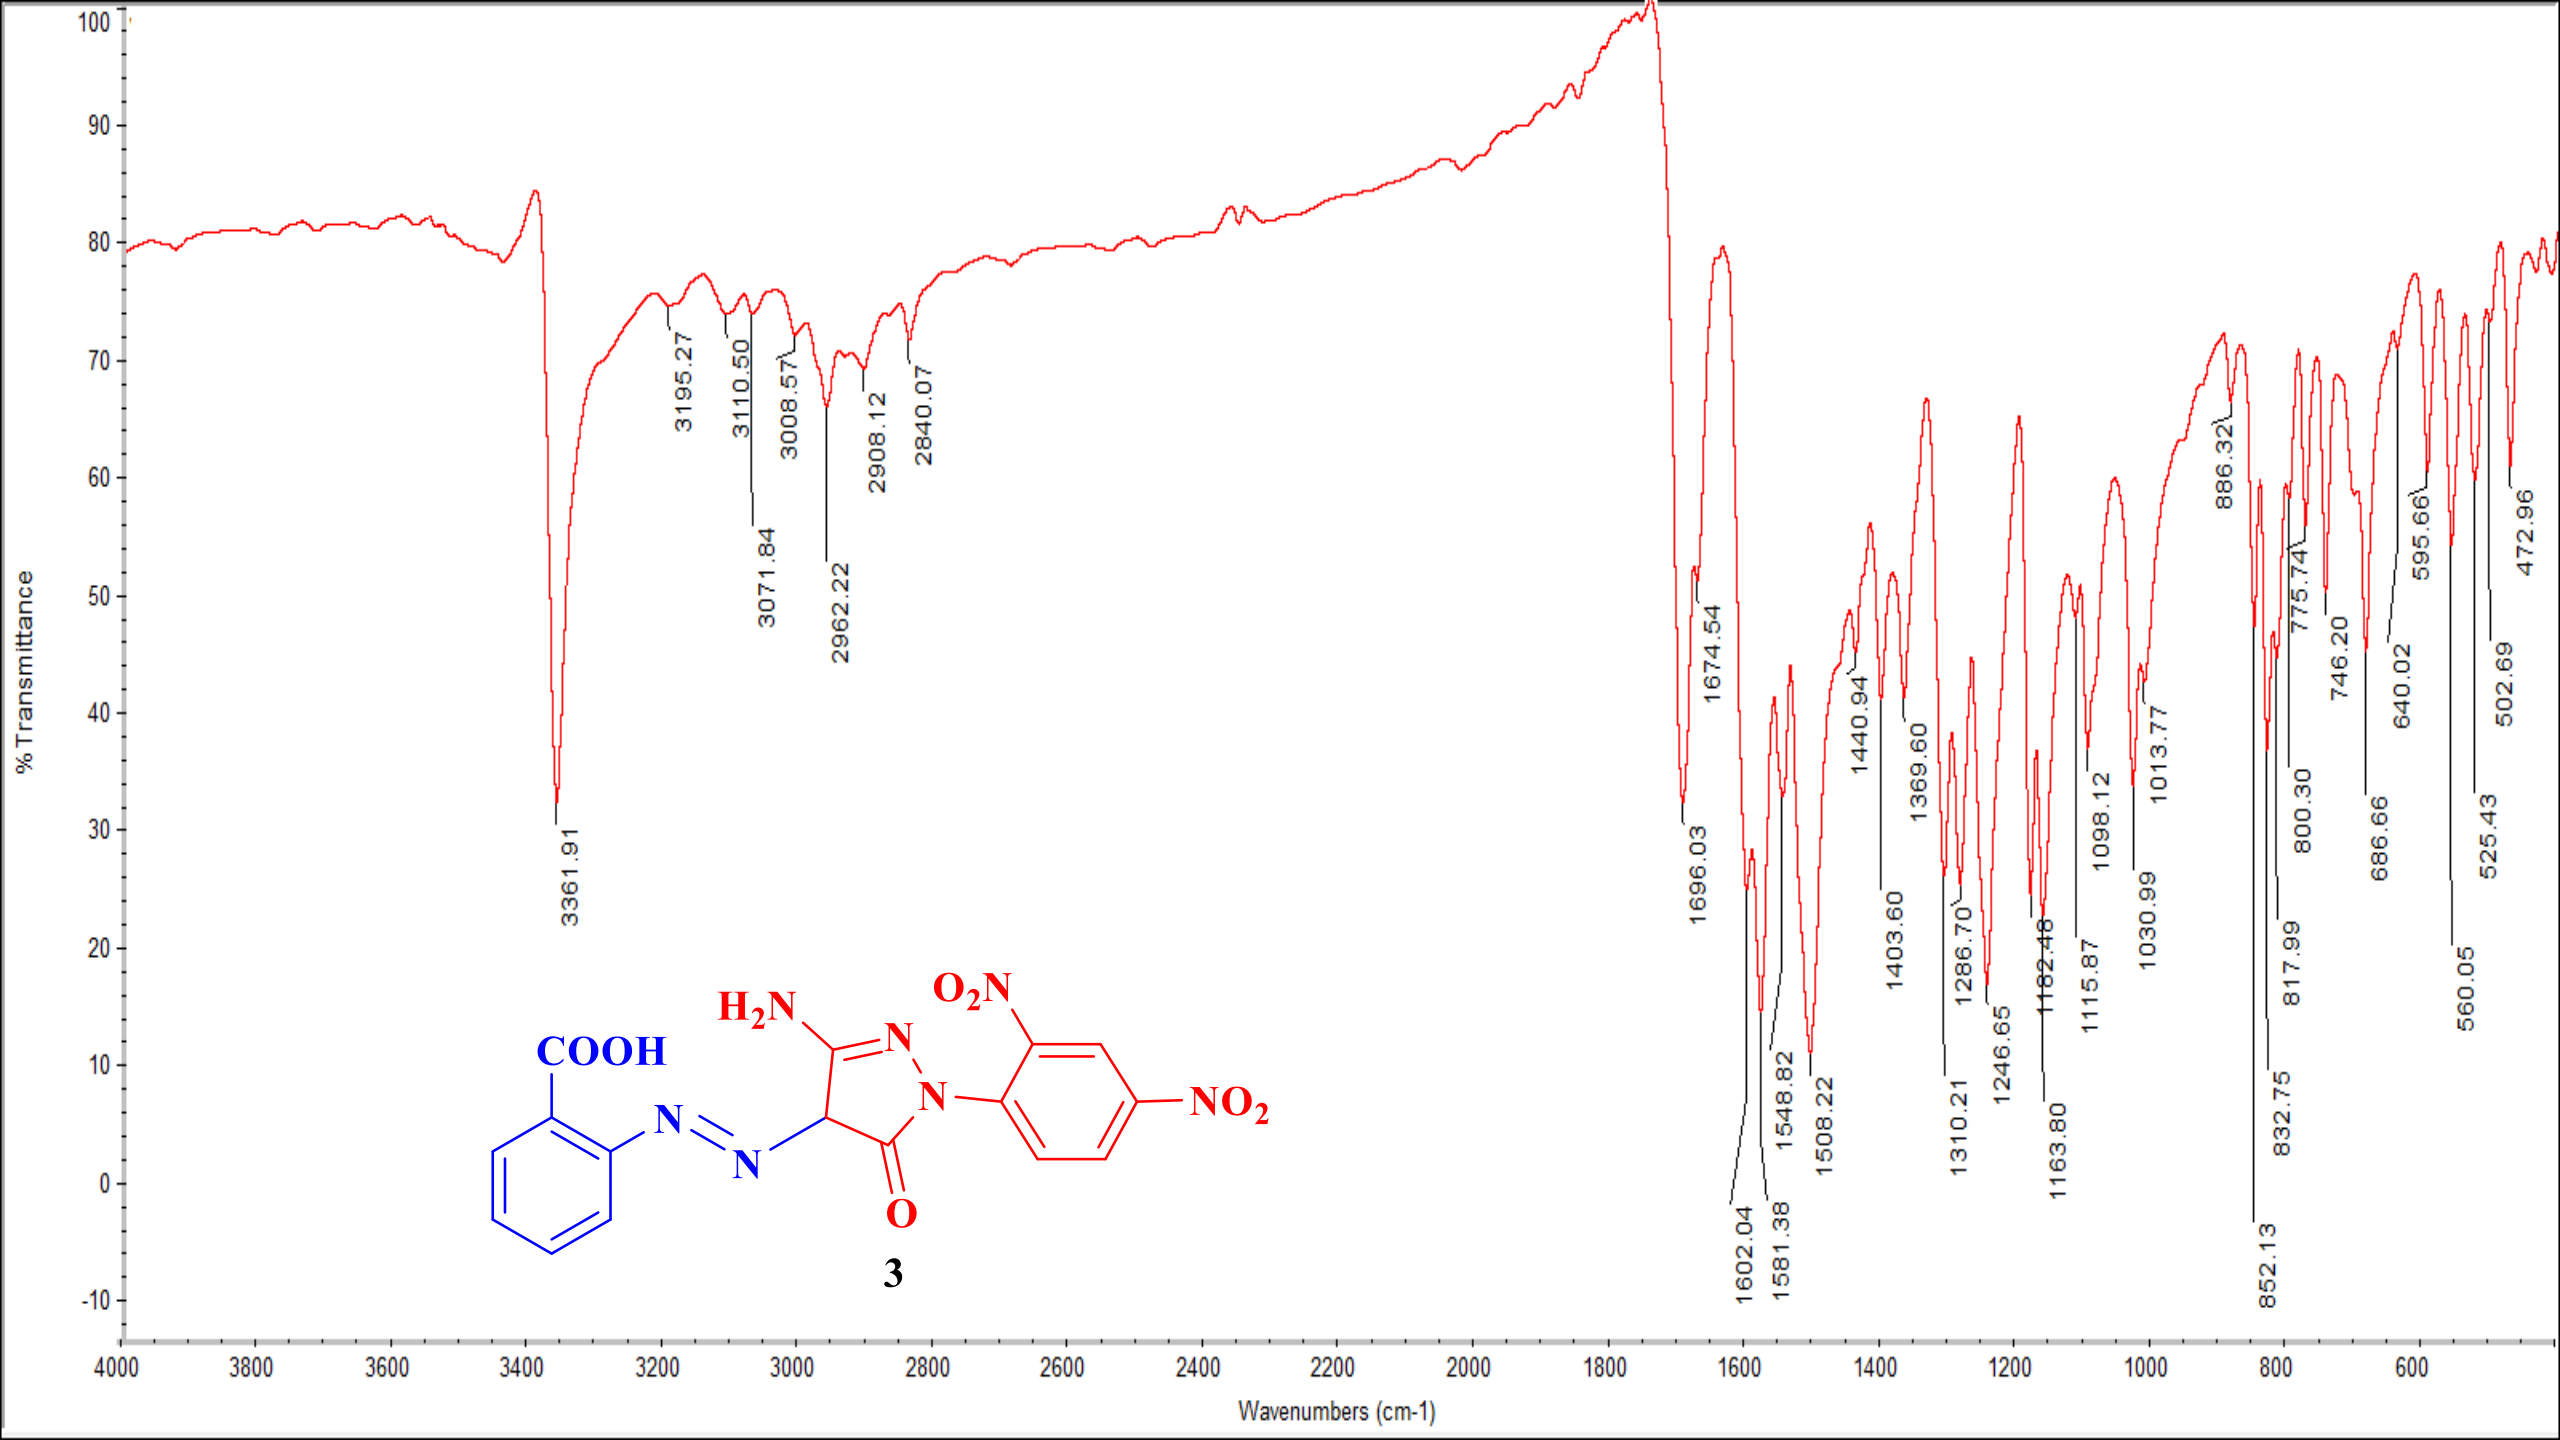

REC3-Hnmr-RR

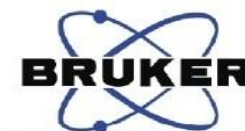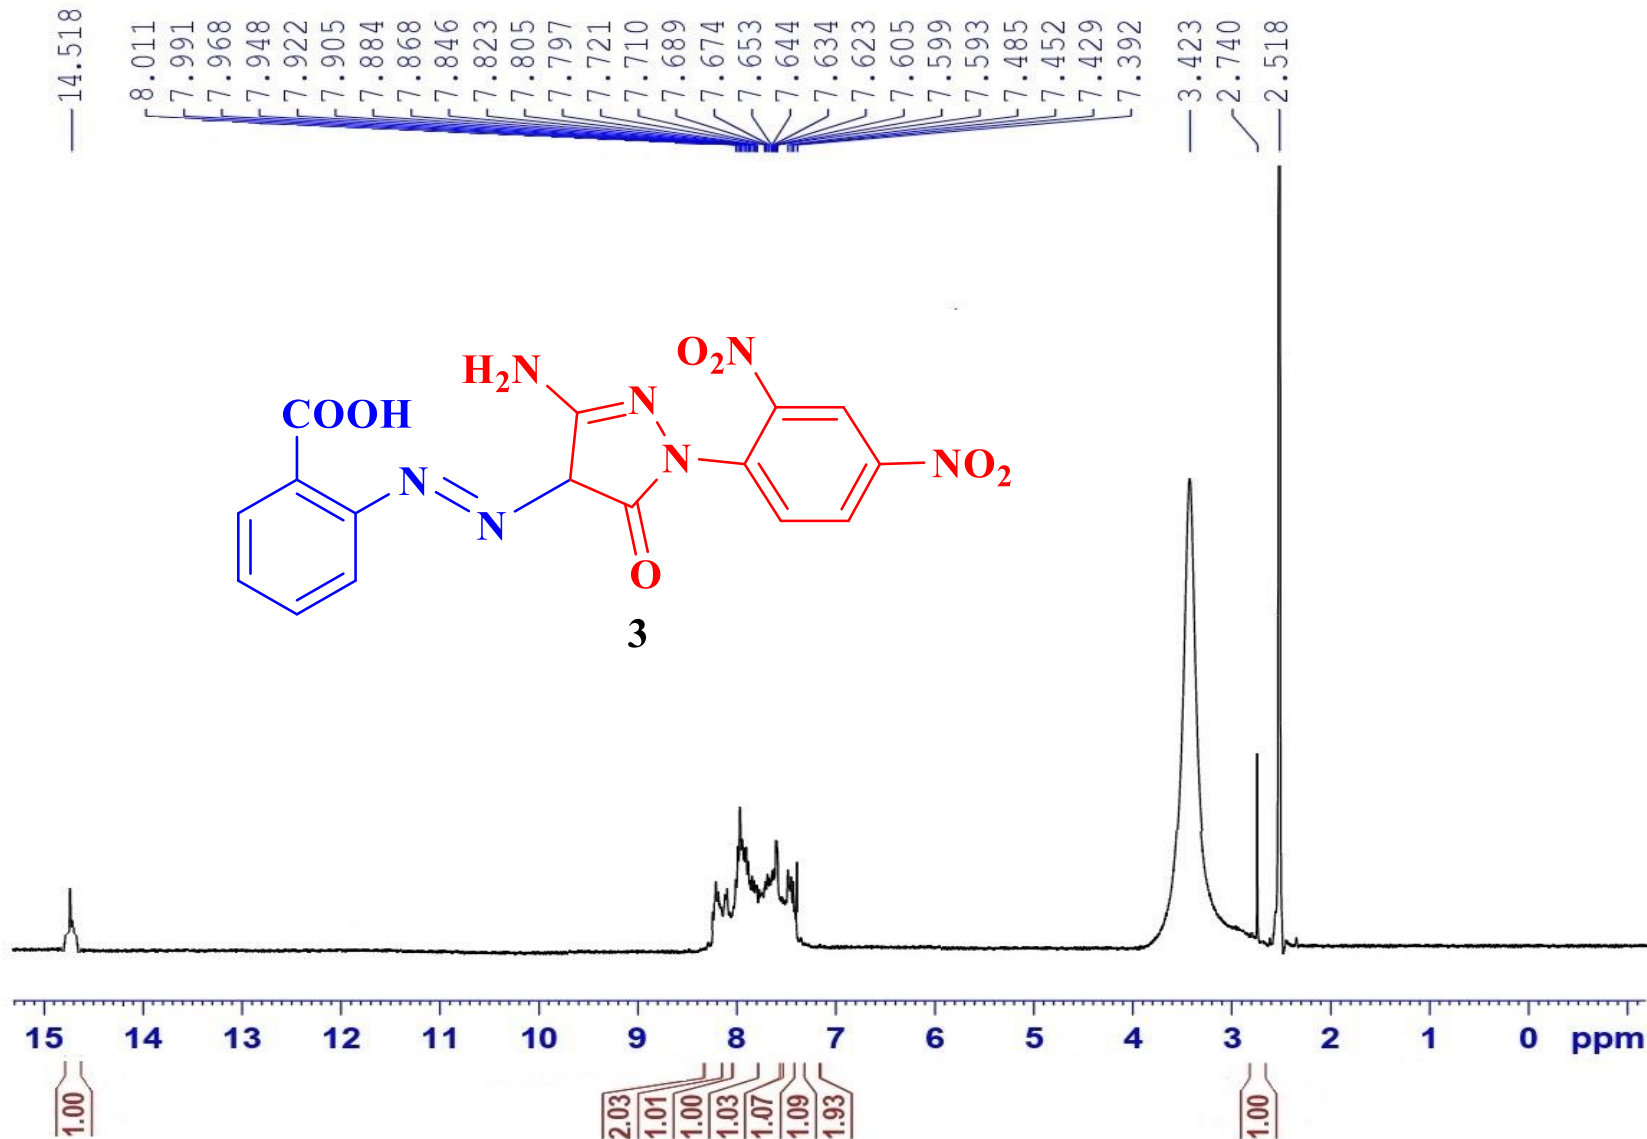

F2 - Acquisition Parameters  
 Date\_ 20240623  
 Time\_ 15.14 h  
 INSTRUM spect  
 PROBHD z108618\_0945 (   
 PULPROG zg30  
 TD 65536  
 SOLVENT DMSO  
 NS 16  
 DS 2  
 SWH 8012.820 Hz  
 FIDRES 0.244532 Hz  
 AQ 4.0894465 sec  
 RG 197.77  
 DW 62.400 usec  
 DE 6.50 usec  
 TE 0 K  
 D1 1.00000000 sec  
 TD0 1  
 SFO1 400.2024712 MHz  
 NUC1 1H  
 P1 13.50 usec  
 PLW1 13.00000000 W

F2 - Processing parameters  
 SI 65536  
 SF 400.2000000 MHz  
 WDW EM  
 SSB 0  
 LB 0.30 Hz  
 GB 0  
 PC 1.00

# REC3-Cnmr-HG

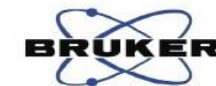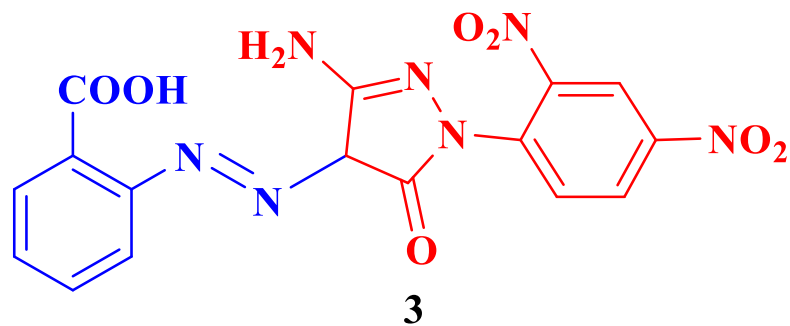

3

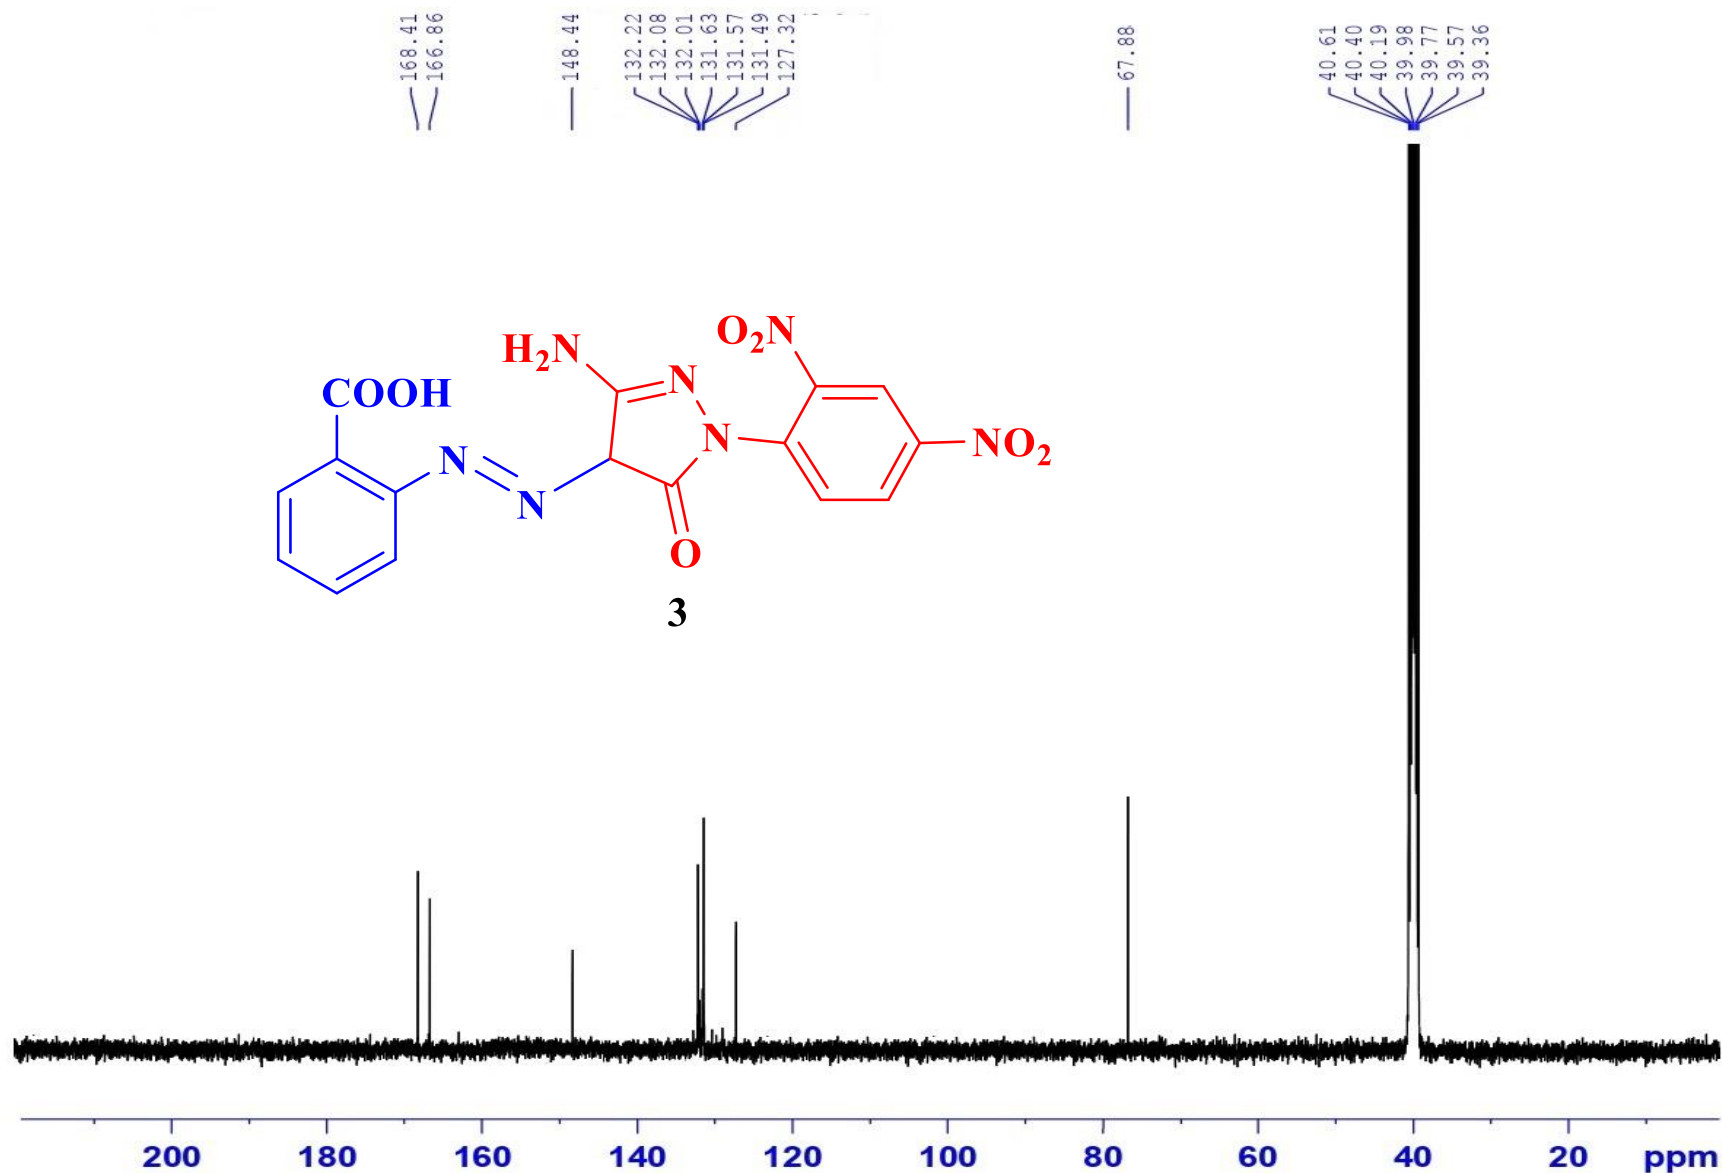

F2 - Acquisition Parameters  
Date\_ 20240628  
Time 19.49 h  
INSTRUM spect  
PROBHD 2108618\_0945 (zpgpg30)  
PULPROG 65536  
TD 2100  
SOLVENT DMSO  
NS 2100  
DS 4  
SWH 24038.461 Hz  
FIDRES 0.733596 Hz  
AQ 1.3631488 sec  
RG 197.77  
DW 20.800 usec  
DE 6.50 usec  
TE 296.4 K  
D1 2.00000000 sec  
D11 0.03000000 sec  
TD0 1  
SFO1 100.6404331 MHz  
NUC1 13C  
P1 10.00 usec  
PLW1 47.00000000 W  
SFO2 400.2016008 MHz  
NUC2 1H  
CPDPRG[2] waltz16  
PCPD2 90.00 usec  
PLW2 13.00000000 W  
PLW12 0.29249999 W  
PLW13 0.14713000 W

F2 - Processing parameters  
SI 32768  
SF 100.6303700 MHz  
WDW EM  
SSB 0  
LB 1.00 Hz  
GB 0  
PC 1.40



REC3 #237 RT: 3.98 P: + SB: 10 2.43 , 2.76-2.90 NL: 5.29E3  
T: {0,0} + c EI Full ms [40.00-1000.00]

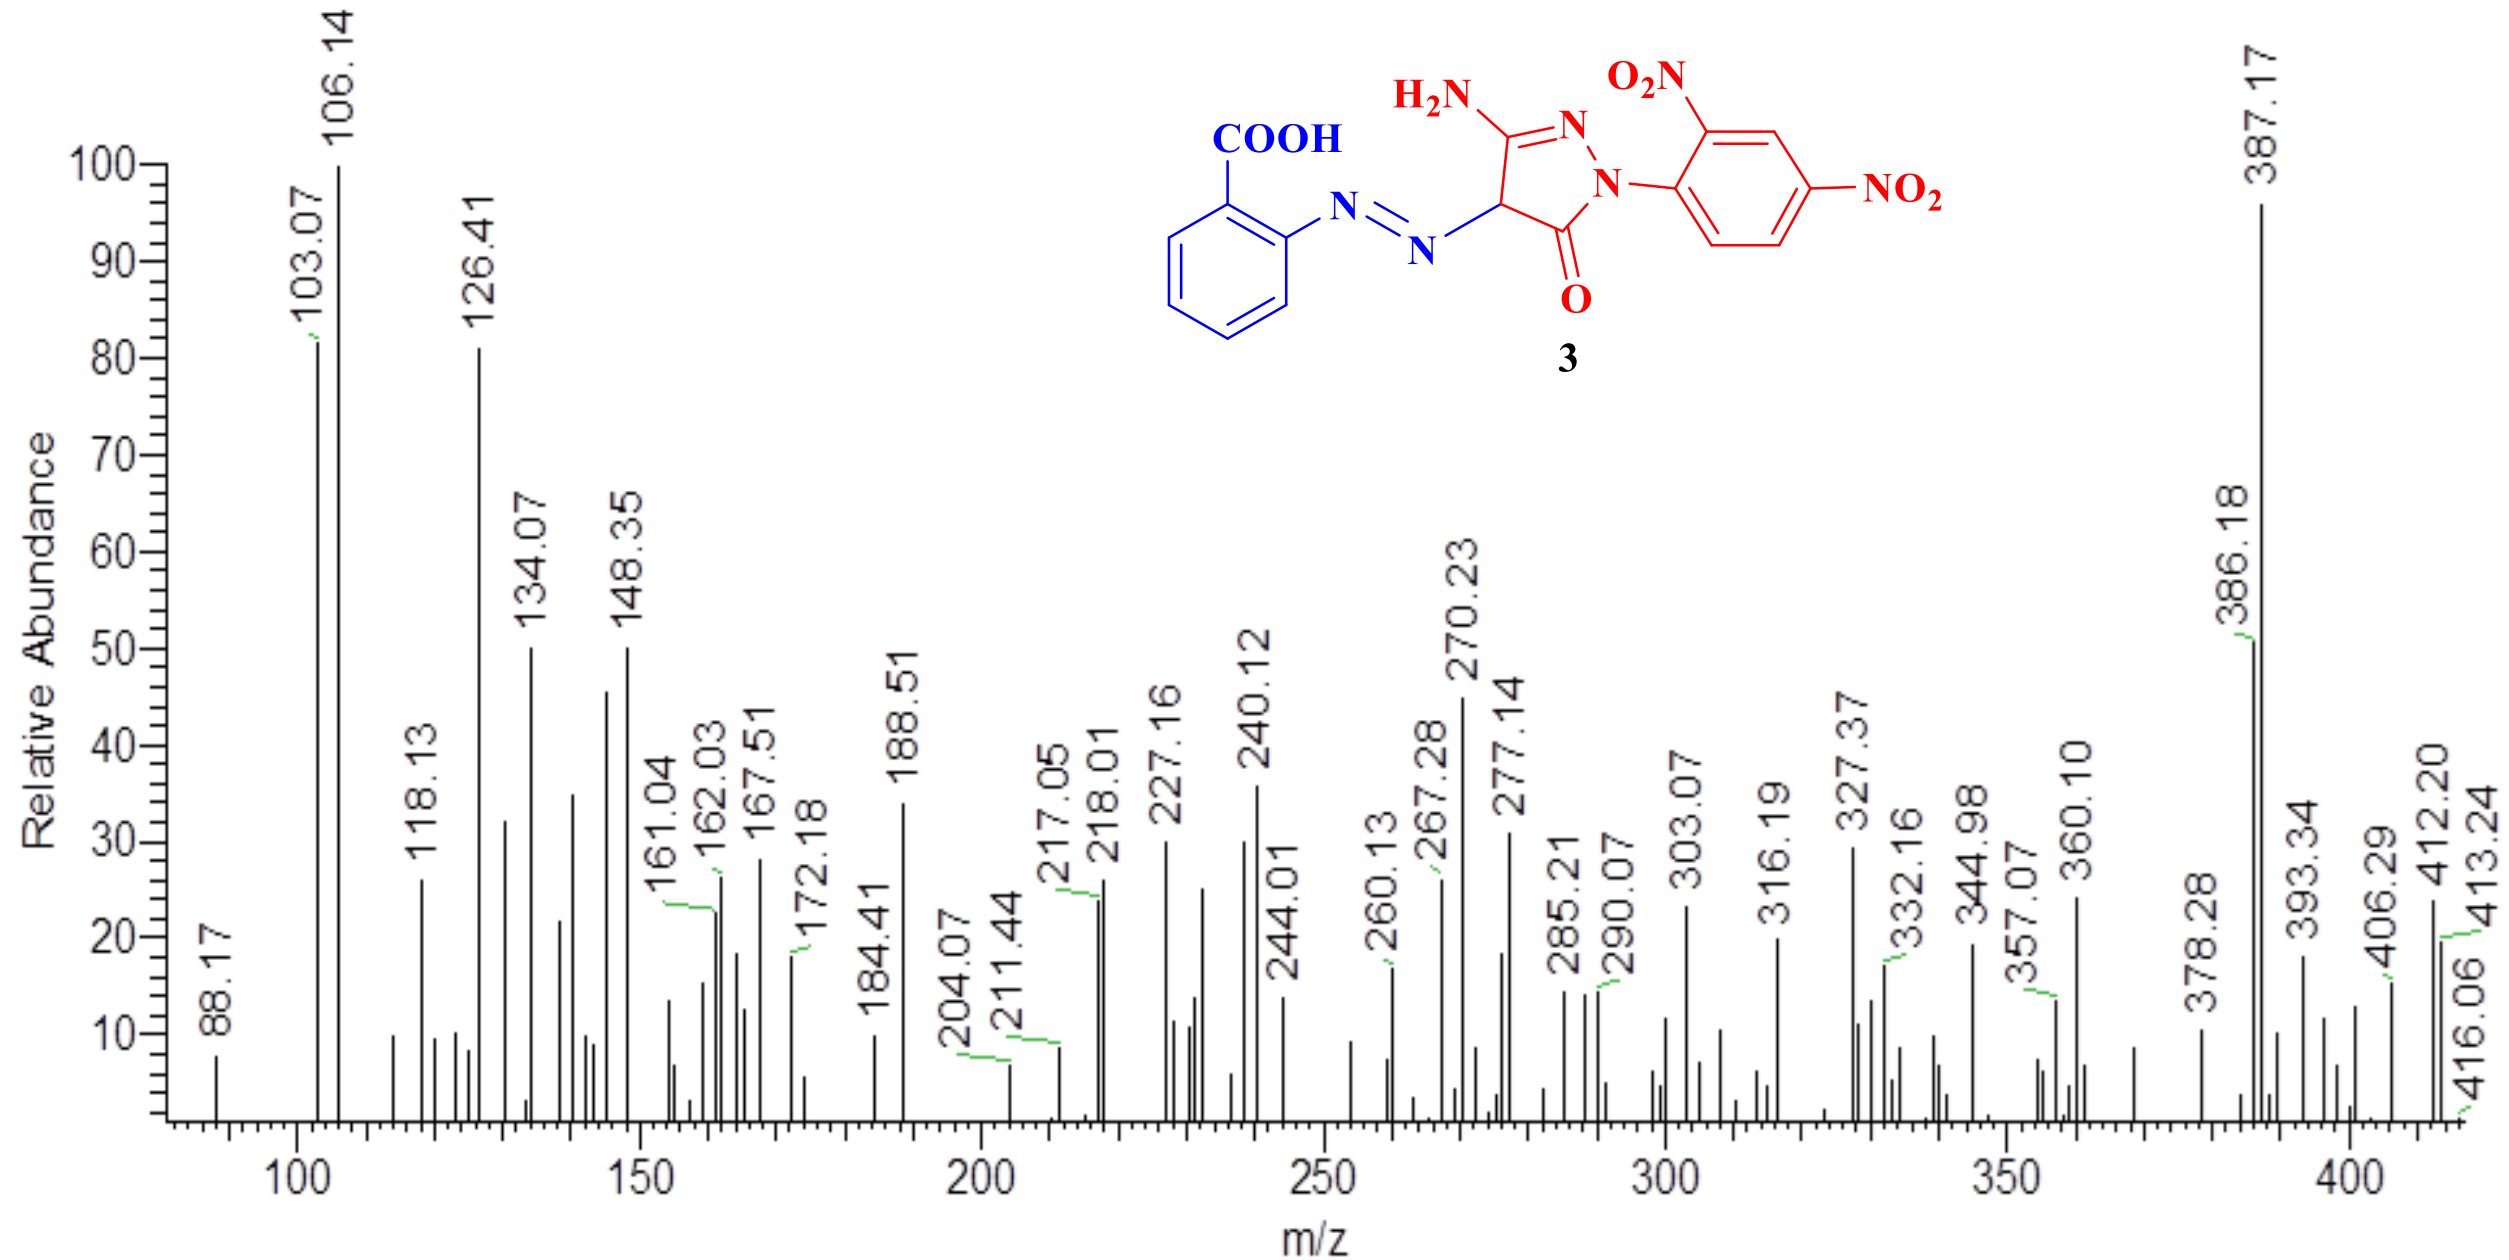

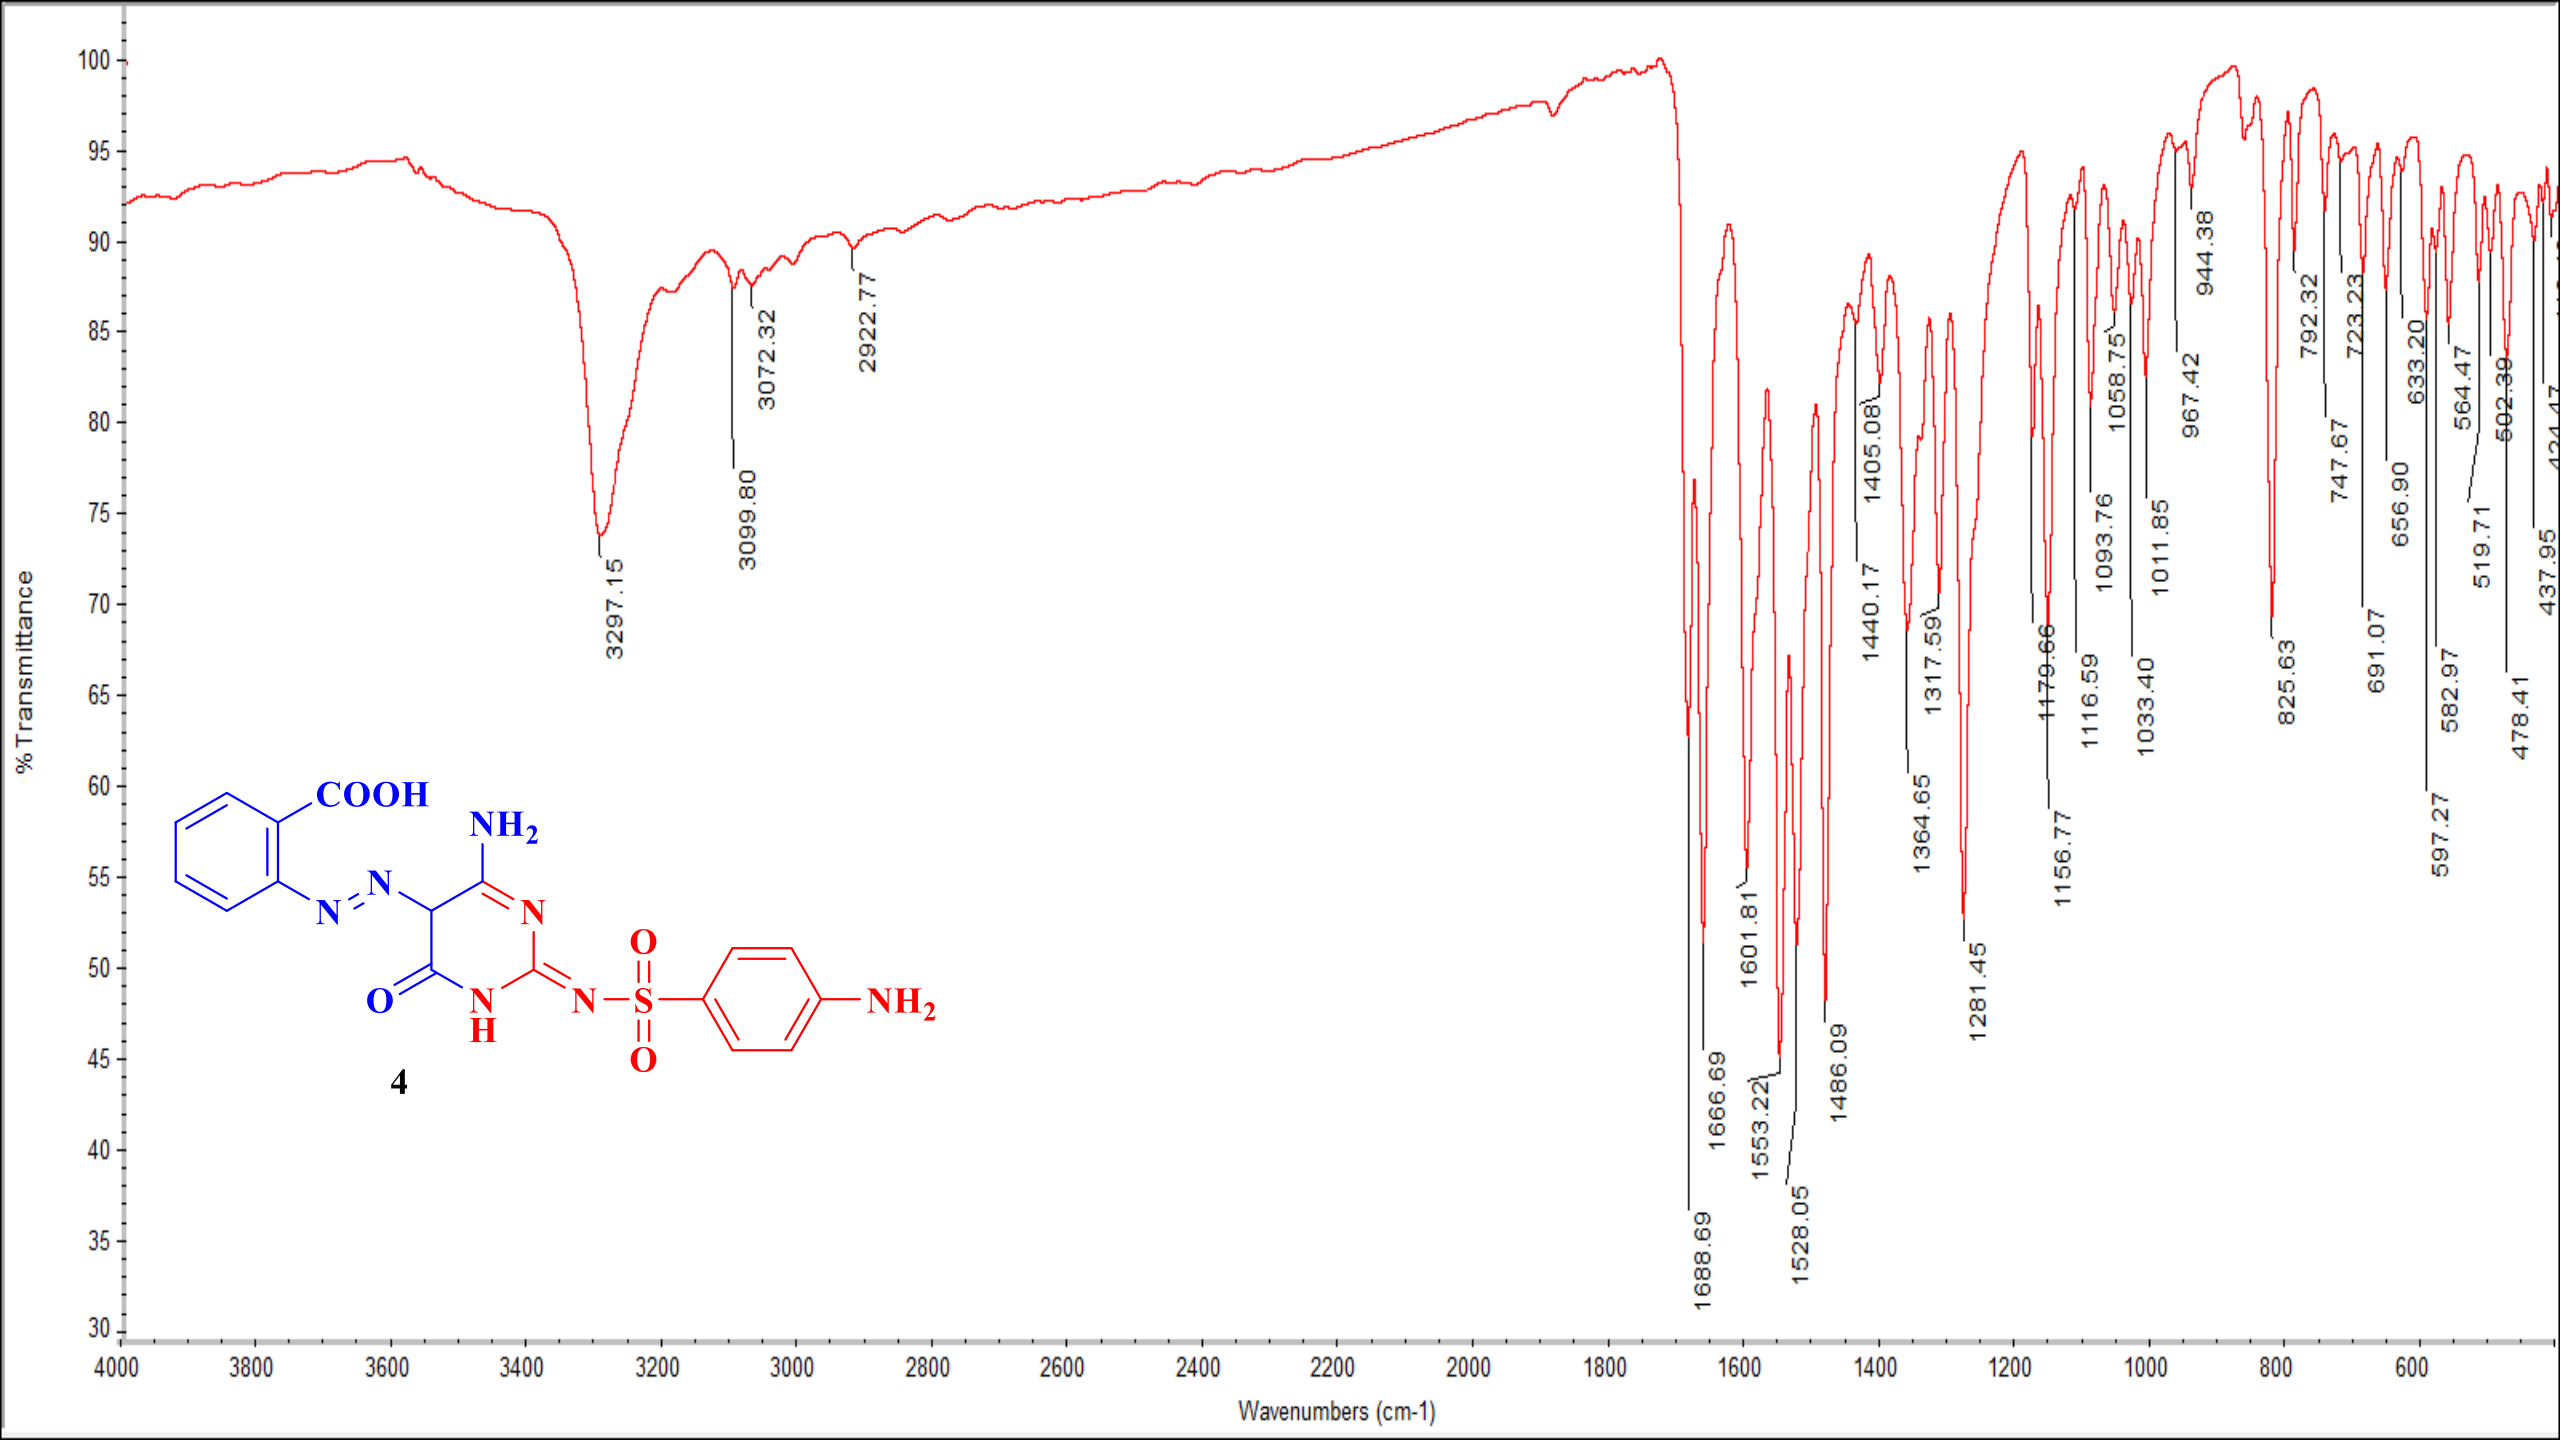

REC14-Hnmr-RR

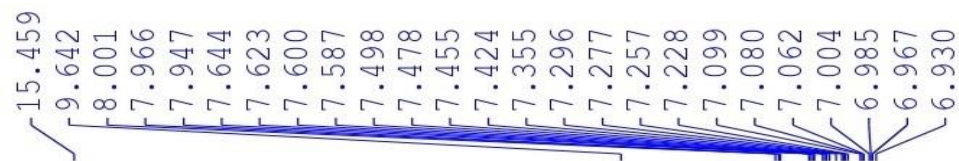

— 3.484  
— 2.520  
— 1.738

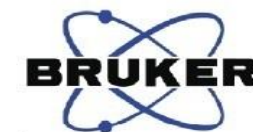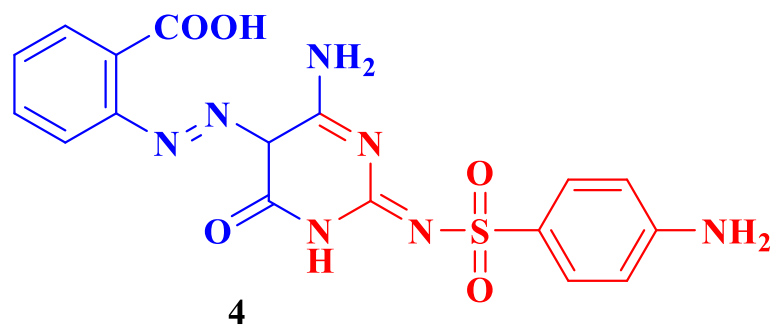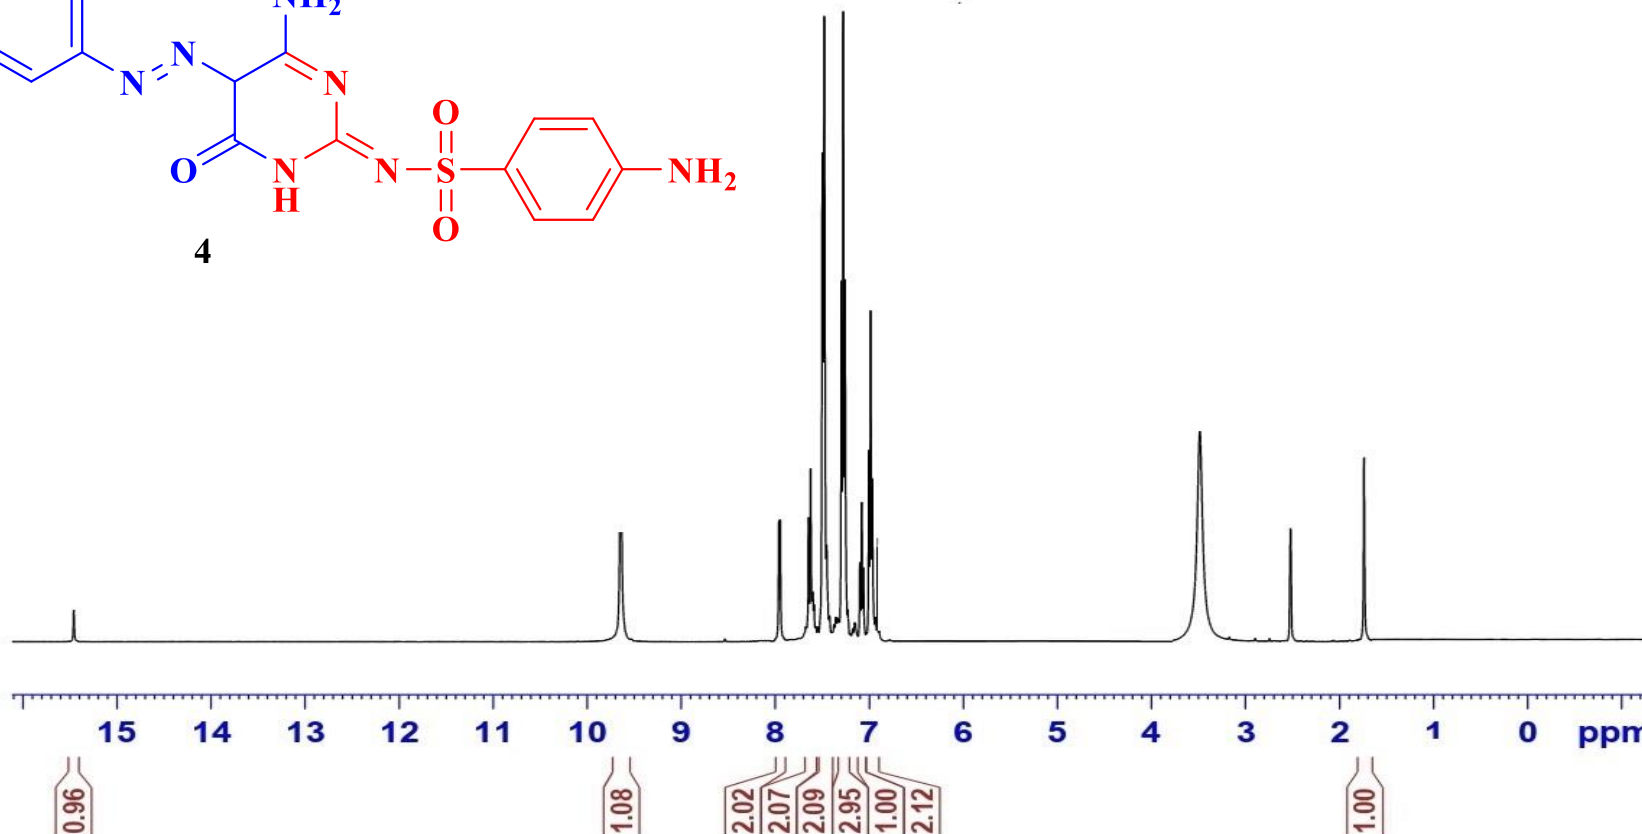

F2 - Acquisition Parameters  
 Date\_ 20240628  
 Time\_ 15.88 h  
 INSTRUM spect  
 PROBHD zg30  
 PULPROG 65536  
 TD 16  
 SOLVENT DMSO  
 NS 2  
 DS 8012.820 Hz  
 SWH 0.244532 Hz  
 FIDRES 4.0894465 sec  
 AQ 58.17  
 RG 62.400 usec  
 DE 6.50 usec  
 TE 0 K  
 D1 1.00000000 sec  
 TD0 1  
 SFO1 400.2024712 MHz  
 NUC1 1H  
 P1 13.50 usec  
 PLW1 13.00000000 W

F2 - Processing parameters  
 SI 65536  
 SF 400.2000000 MHz  
 WDW EM  
 SSB 0  
 LB 0.30 Hz  
 GB 0  
 PC 1.00

# REC14-CNMR-DMSO-SH

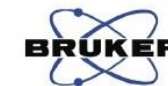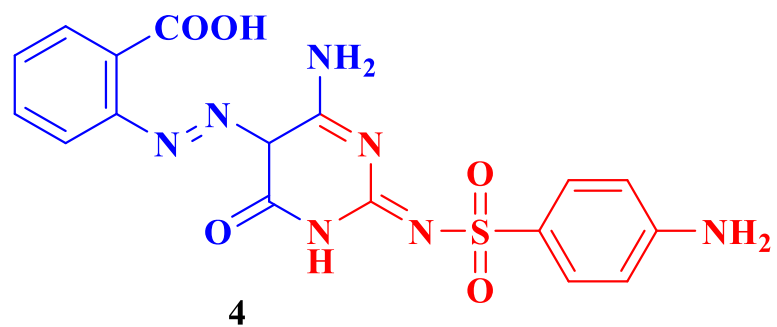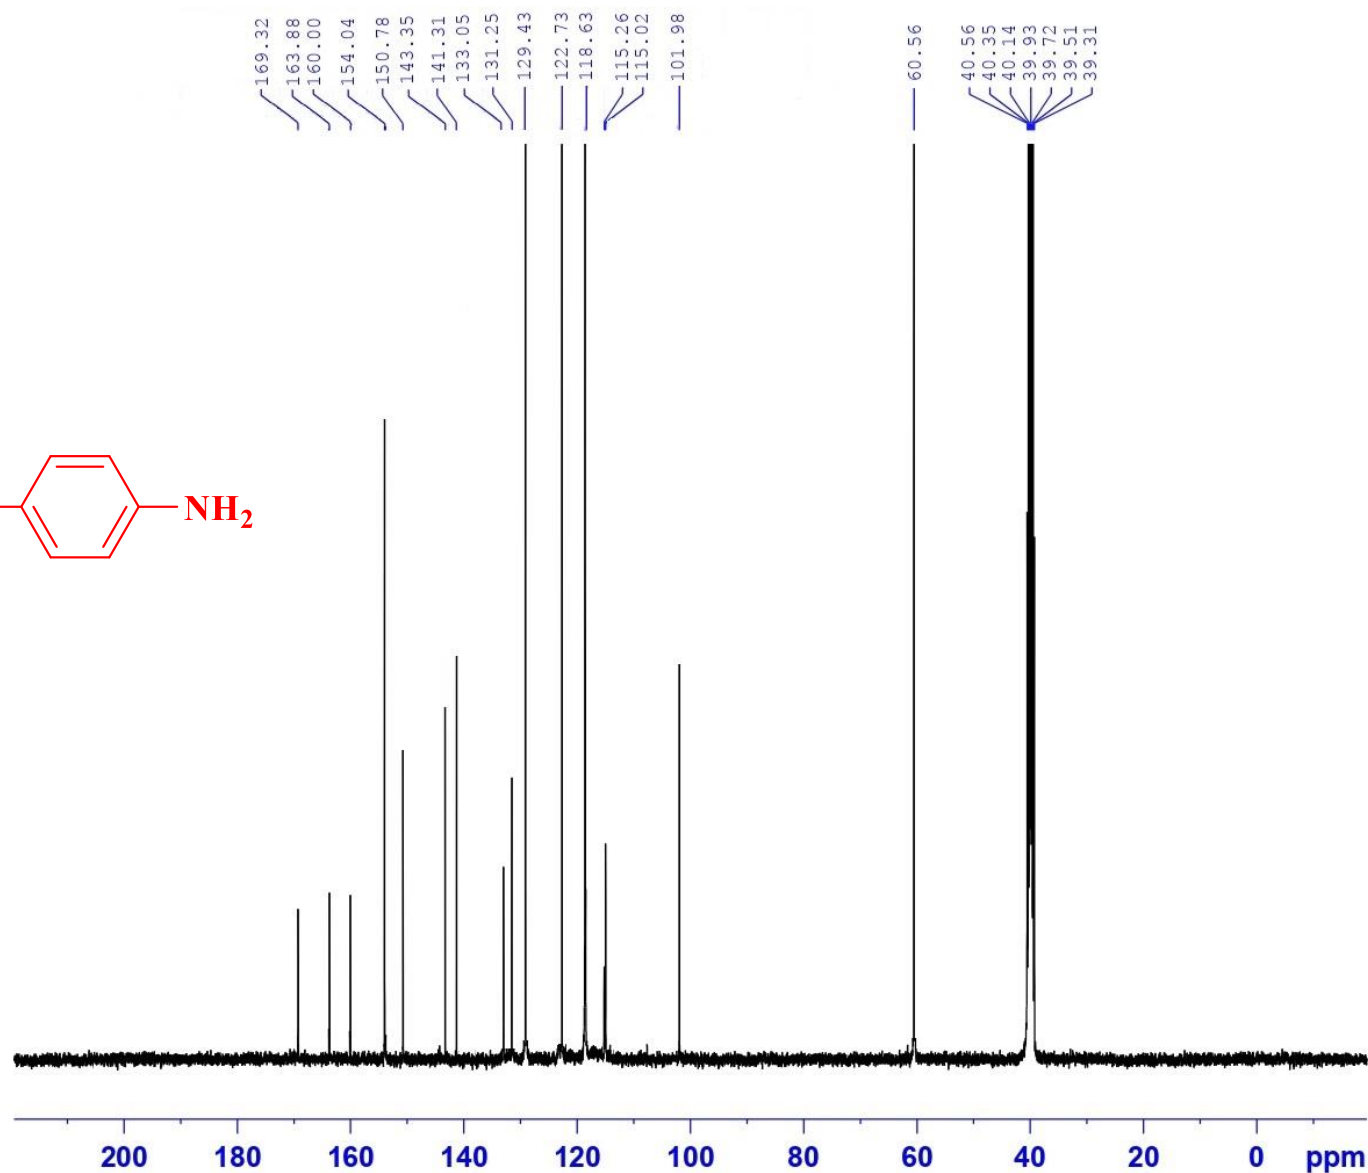

F2 - Acquisition Parameters  
 Date\_ 20240629  
 Time 10.34 h  
 INSTRUM spect  
 PROCNO 2108618  
 PULPROG zgpg30  
 TD 65536  
 SOLVENT DMSO  
 NS 2200  
 DS 4  
 SSW 24028.461 Hz  
 FIDRES 0.722596 Hz  
 AQ 1.2621488 sec  
 RG 197.77  
 DW 20.800 usec  
 DE 8.50 usec  
 TE 296.7 K  
 D1 2.0000000 sec  
 D11 0.0200000 sec  
 TDO 1  
 SFO1 100.6204221 MHz  
 NUC1 13C  
 P1 10.00 usec  
 PLM1 47.0000000 W  
 SFO2 400.2016008 MHz  
 NUC2 1H  
 CPDPRG12 waltz16  
 PCPD 90.00 usec  
 PLM2 12.0000000 W  
 PLM12 0.29249999 W  
 PLM13 0.14718000 W  
 F2 - Processing parameters  
 SI 227.68  
 SF 100.6203700 MHz  
 WDW EM  
 SSB 0  
 LB 1.00 Hz  
 GB 0  
 PC 1.40

REC14 #93 RT: 1.57 P: + SB: 13 1.22-1.41, 1.31 NL: 6.88E2

T: {0,0} + c EI Full ms [40.00-1000.00]

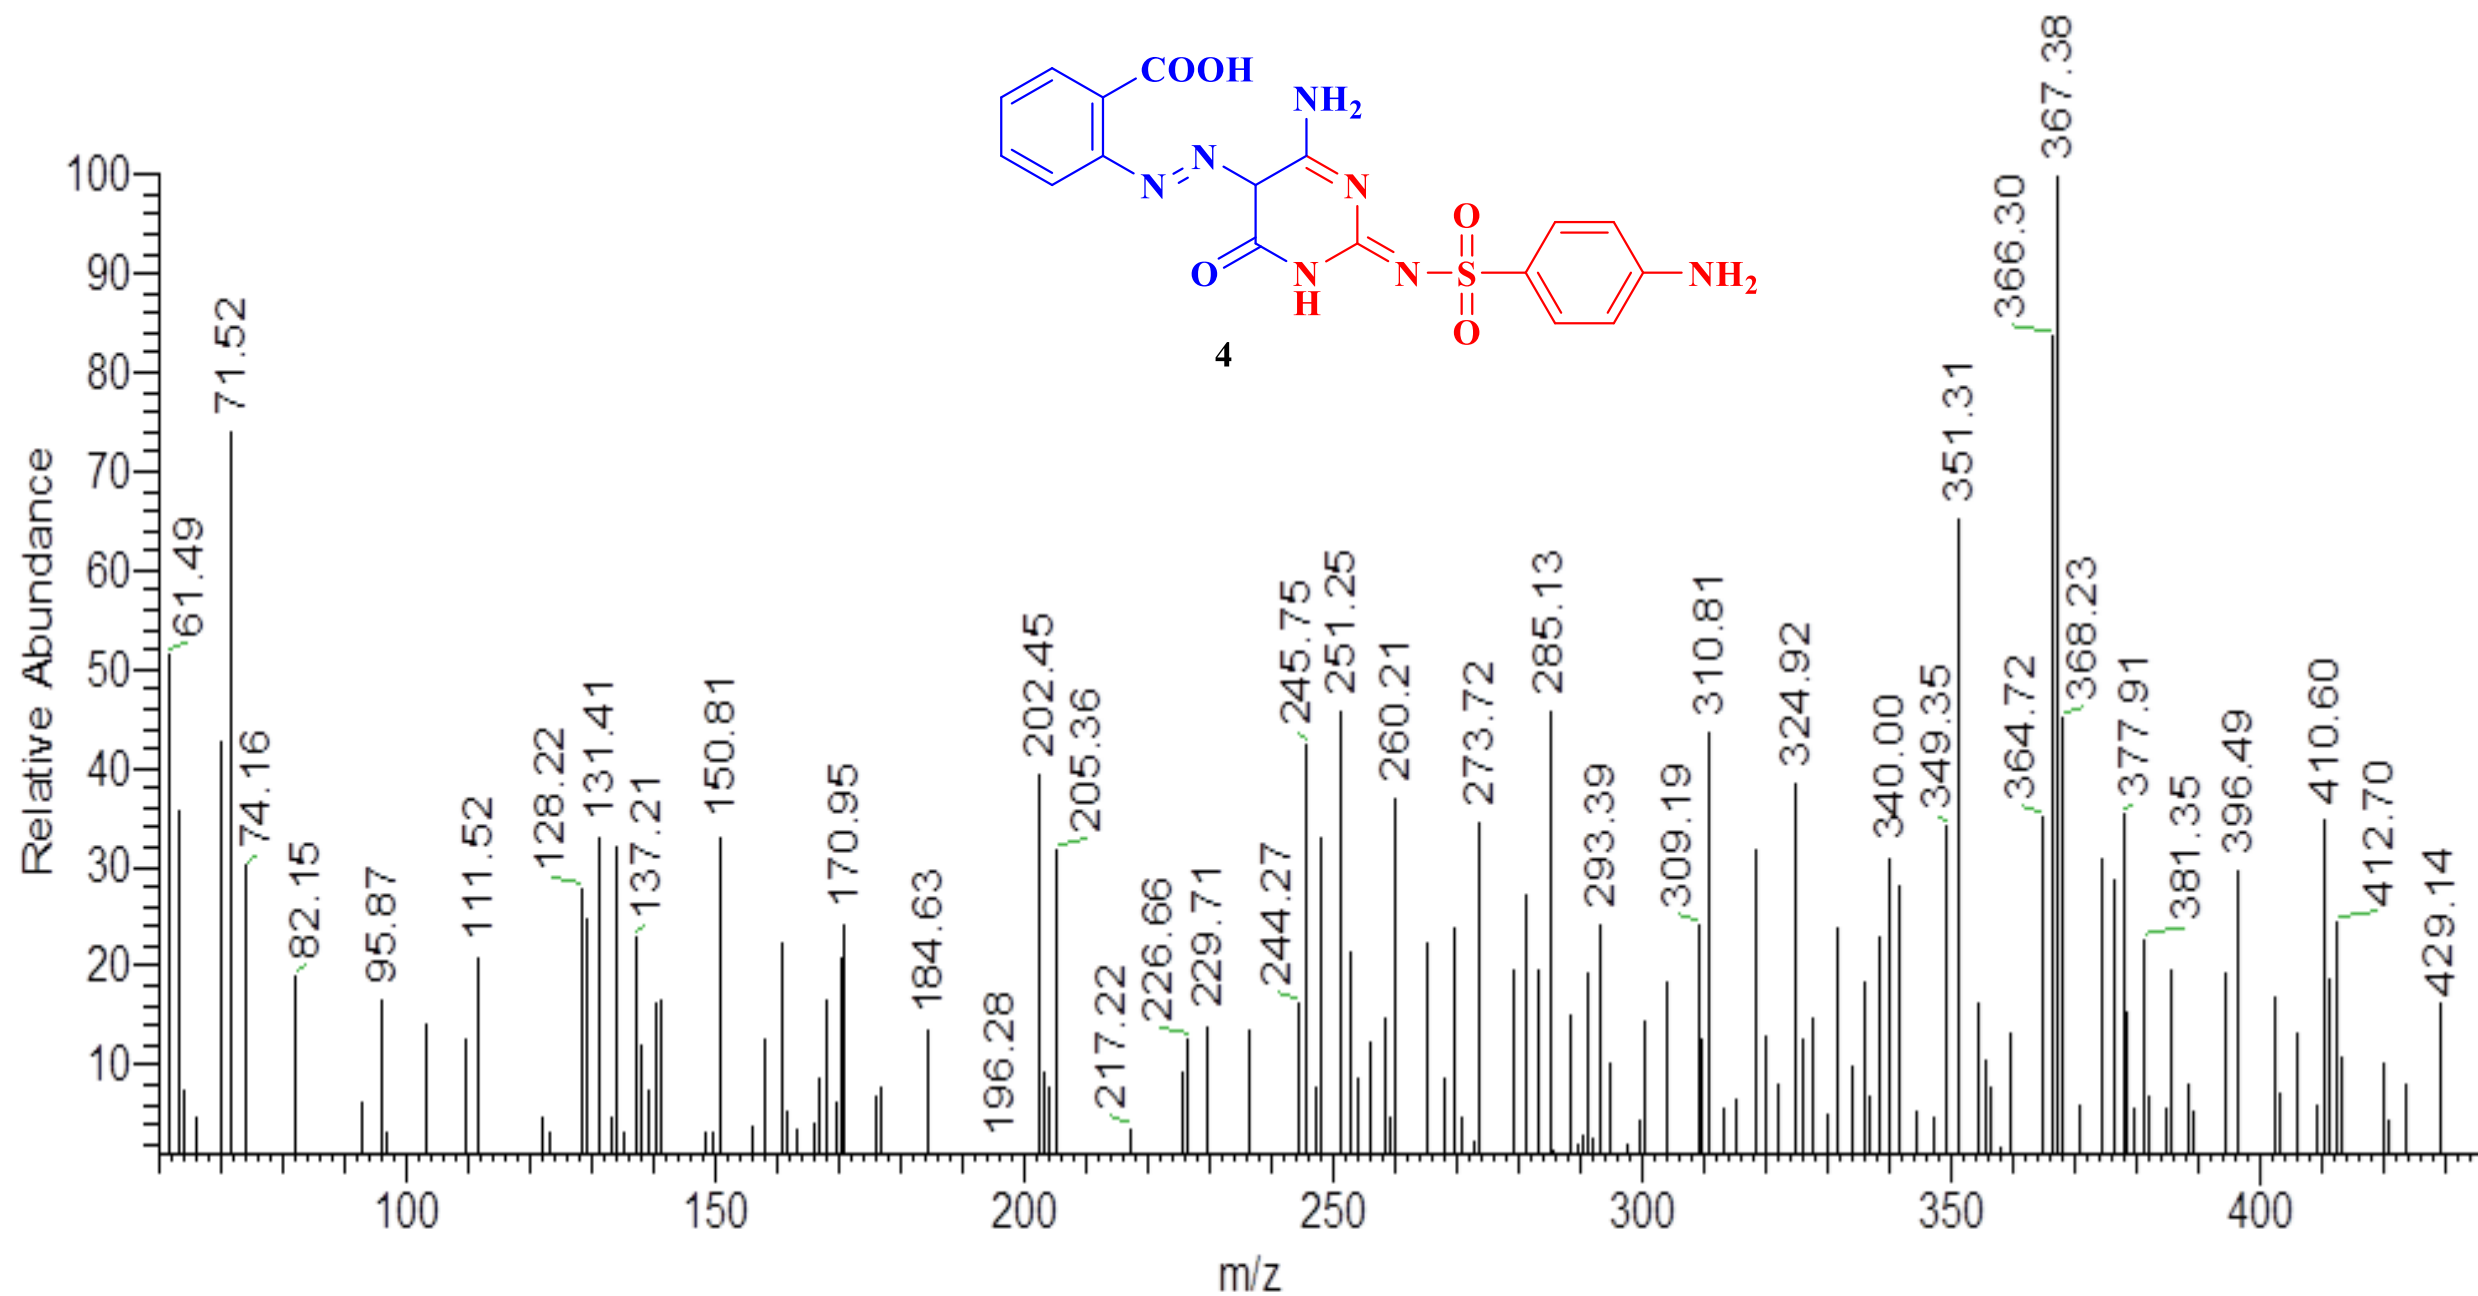

Supplement: d5ra00166h1.pdf [file d5ra00166h1.pdf]
